# Supplementary material
Source: PubMed Central journal article supplement (PMC2832946)
Supplement: supp_M109.091603_jbc.M109.091603-1.pdf [file supp_M109.091603_jbc.M109.091603-1.pdf]

## Supplemental Table and Figure Legends and Methods

## Supplemental Figure 1

*GSK-3 C-terminal deletion mutants exhibit impaired ability to suppress gene expression of Wnt target Axin2* - GSK-3 $\alpha^{-/-}$  GSK-3 $\beta^{-/-}$  embryonic stem cells (obtained from Dr. Brad Doble, McMaster University, and Dr. James Woodgett, University of Toronto), which display constitutive active Wnt signaling (42), were transfected with 1  $\mu$ g GSK-3 construct. After 48 hours, RNA was isolated and subjected to reverse transcription. Resulting cDNA was then analyzed by quantitative PCR. Expression of WT GSK-3 $\alpha$  (Figure S1) suppressed transcriptional activation of Wnt target gene Axin2 compared to empty vector (Vec). However, GSK-3 C-terminal deletion,  $\alpha\Delta$ CT-4 was impaired in its ability to suppress Axin2 transcription. As expected, inactive point mutant  $\alpha$ K148R was unable to suppress Wnt signaling, while  $\alpha$ Y279F retained activity and suppressed Wnt activation comparable to WT GSK-3 $\alpha$ . A similar trend was observed with GSK-3 $\beta$  (data not shown). (RQ, relative quantity; WT, wild type;  $\Delta$ , deleted; CT, C-terminus)

## Supplemental Figure 2

*GSK-3 C-terminal deletion mutants mislocalize* - GSK-3 constructs were directionally cloned into Gateway destination vector pCSCCherry DEST (obtained from Dr. Nathan Lawson, University of Massachusetts Medical School), which generated N-terminal Cherry-tagged proteins. HeLa cells were transiently transfected with 1  $\mu$ g of an N-terminal Cherry-tagged GSK-3 construct in a 6-well plate. Transfected cells were transferred to coverslips in a 24-well plate and were subsequently fixed with 4% paraformaldehyde (Polysciences, Inc.) followed by permeabilization with 0.1% Triton-X100 (Sigma). Coverslips were mounted using VECTASHIELD mounting media with DAPI (Vector Laboratories). Localization was visualized at 63X magnification with a Leica DMIRB microscope (Leica Microsystems). WT GSK-3 $\alpha$  (Figure S2A) and WT GSK-3 $\beta$  (Figure S2B) localized largely in a diffuse pattern in the cytoplasm. Localization of C-terminal deletion mutants  $\alpha\Delta$ CT-4 and  $\beta\Delta$ CT-4 differed dramatically and exhibited aggregate-like inclusions, which often localized to the perinuclear region. The mislocalization of  $\alpha\Delta$ CT-4 and  $\beta\Delta$ CT-4 did not appear to be due to the loss of catalytic activity or the lack of Tyr<sup>279/216</sup> phosphorylation as point mutants  $\alpha$ K148R and  $\beta$ K85R and  $\alpha$ Y279F and  $\beta$ Y216F point mutants localized similar to WT GSK-3 (data not shown). (WT, wild type;  $\Delta$ , deleted; CT, C-terminus)

## Supplemental Figure 3

*GSK-3 C-terminal deletion mutants exhibit reduced half-lives* - HEK 239T cells were transiently transfected with GST-tagged GSK-3 constructs. Twenty-four hours after transfection, cells were pulsed with 85 uCi <sup>35</sup>S-methionine labeled media (Perkin Elmer) per well for 15 minutes and subsequently chased for 0 minutes, 6 hours, 12 hours, and 24 hours. Equal amounts of protein lysate from each time point was purified on glutathione sepharose and separated by Tricine-SDS-PAGE. After electrophoresis, the gel was dried and exposed to a phosphor screen (Amersham Biosciences) for 24 - 48 hours. Images were collected from a Typhoon 9400 variable mode imager (Amersham Biosciences) and analyzed using ImageQuant software (Amersham Biosciences). Although C-terminal deletion resulted in a reduction in protein half-lives for both GSK-3 $\alpha$  (Figure S3A) and GSK-3 $\beta$  (Figure S3B), constitutive protein expression under the CMV promoter maintained steady-state protein levels. Thus, protein instability is unlikely to account for the loss of activity we observed. Interestingly,  $\alpha\Delta$ CT3 exhibited a slightly longer half-life than WT GSK-3 $\alpha$  suggesting that  $\alpha\Delta$ CT3 gains conformational stability. However, this stabilized structure did not result in an active enzyme and appears to be an isoform-specific phenomenon

as it was not noted with GSK-3 $\beta$ . The significance of this observation requires further investigation.  
(vec, vector; WT, wild type;  $\Delta$ , deleted; CT, C-terminus)

Supplemental Figure 1

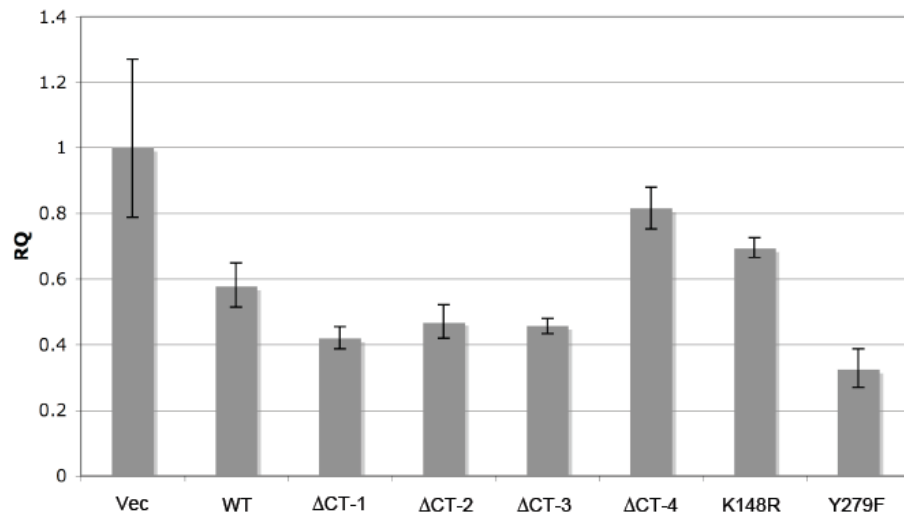

Supplemental Figure 2

A)

GSK-3 $\alpha$  WT

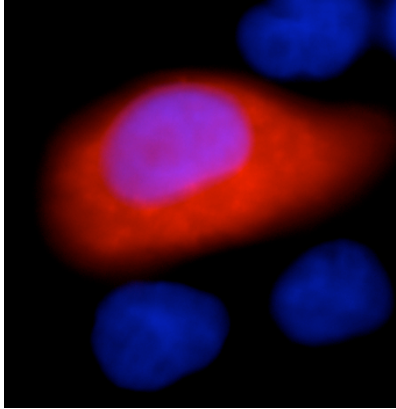

GSK-3 $\alpha$   $\Delta$ CT-4

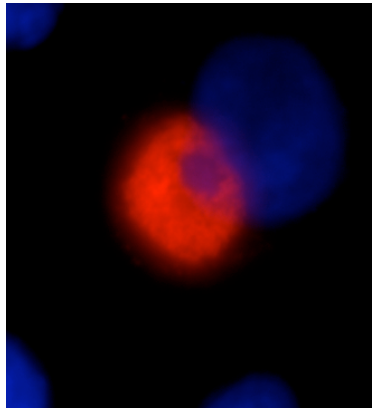

B)

GSK-3 $\beta$  WT

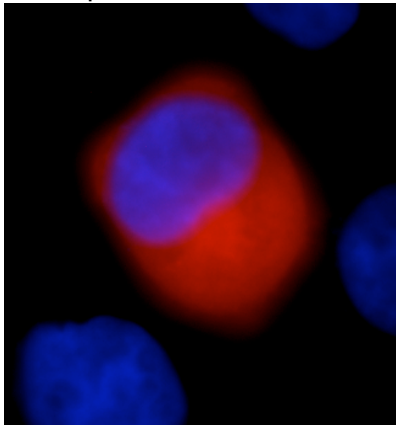

GSK-3 $\beta$   $\Delta$ CT-4

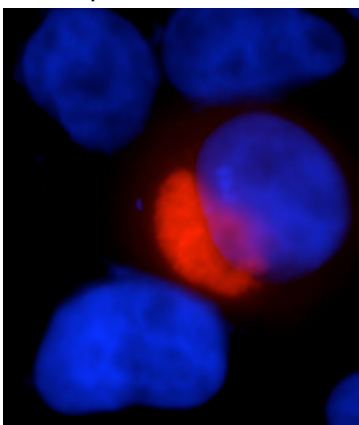

Supplemental Figure 3

A)

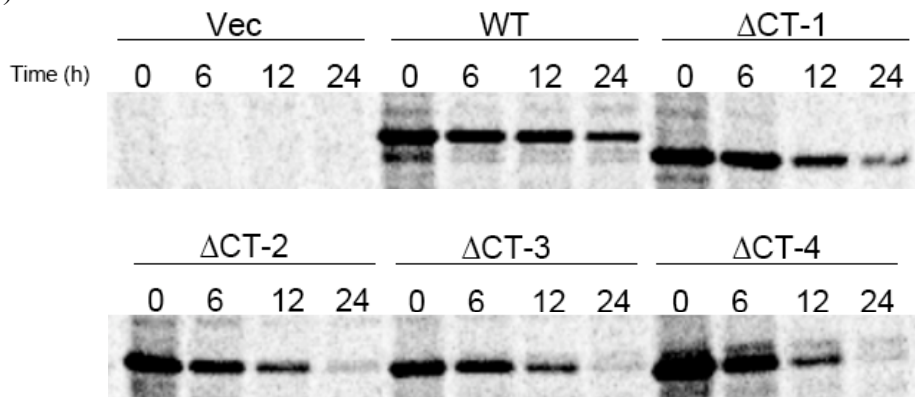

|                 | WT       | ΔCT-1   | ΔCT-2    | ΔCT-3    | ΔCT-4   |
|-----------------|----------|---------|----------|----------|---------|
| Half-life (min) | 289 ± 17 | 224 ± 7 | 169 ± 12 | 315 ± 29 | 173 ± 4 |

B)

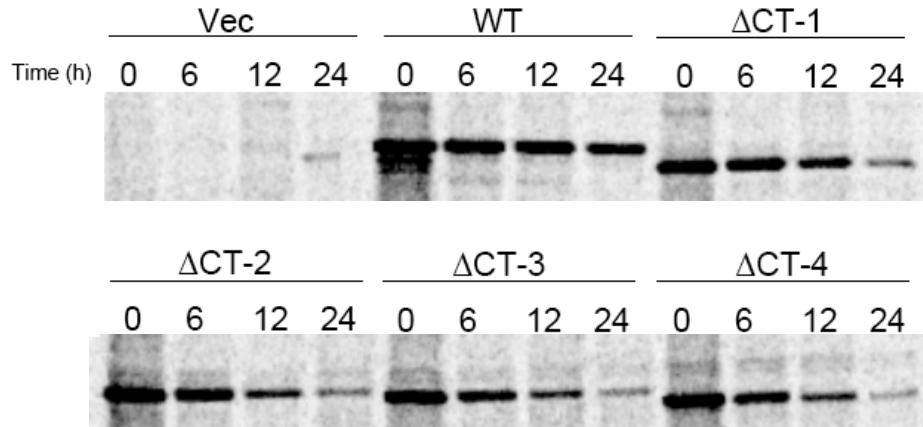

|                 | WT       | ΔCT-1    | ΔCT-2    | ΔCT-3    | ΔCT-4    |
|-----------------|----------|----------|----------|----------|----------|
| Half-life (min) | 630 ± 23 | 347 ± 17 | 289 ± 24 | 224 ± 36 | 210 ± 38 |

Supplemental Table 1

Oligonucleotides used for site-directed mutagenesis. Underlined sequences denote the mutated codon(s).

| Point Mutation           | Sense (5' → 3')                                     | Antisense (5' → 3')                                  |
|--------------------------|-----------------------------------------------------|------------------------------------------------------|
| GSK-3 $\alpha$ S21A      | CAGGGCGCGGACTAGC <u>CGC</u> GTTTCGCGGAGCCCG         | CGGGCTCCGCGAAC <u>CGC</u> GCTAGTCCGCGCCCTG           |
| GSK-3 $\alpha$ K148R     | GAAGTAGTCGCCATC <u>AGGA</u> AGGTTCTCCAGGAC          | GTCCTGGAGAACCTT <u>CCT</u> GATGGCGACTAGTTC           |
| GSK-3 $\alpha$ R159A     | ACAAGAGGTTCAAGAAC <u>GCAG</u> AGCTGCAGATCATGCG      | CGCATGATCTGCAGCTC <u>TGC</u> GTTCTTGAACCTCTTGT       |
| GSK-3 $\alpha$ Y279F     | GGGGAGCCCAATGTCTC <u>CTT</u> CATCTGTTCTCGCTACTAC    | GTAGTAGCGAGAACAGAT <u>GAAG</u> GAGACATTGGGCTCCCC     |
| GSK-3 $\alpha$ P442/443A | GCCATTCTCATC <u>GCTGCT</u> CACTTGAGGTCC             | GGACCTCAAGT <u>GAGCAGC</u> GATGAGAATGGC              |
| GSK-3 $\beta$ S9A        | GGCCCAGAACCACC <u>GCCT</u> TTTGCGGAG                | CTCCGCAAAG <u>GCGG</u> TGGTTCTGGGCC                  |
| GSK-3 $\beta$ K85R       | AACTGGTCGCCATC <u>AGGA</u> AGTATTGCAGGACAA          | TTGTCCTGCAATACTTT <u>CCT</u> GATGGCGACCAGTT          |
| GSK-3 $\beta$ R96A       | AAGAGATTTAAGAAT <u>GCAG</u> AGCTCCAGATCATG          | CATGATCTGGAGCTC <u>TGC</u> ATTCTTAAATCTCTT           |
| GSK-3 $\beta$ Y216F      | GGAGAACCCAATGTTTCG <u>TTT</u> ATCTGTTCTCGGTACTATAGG | CCTATAGTACCGAGAACAGATA <u>AAAC</u> GAAACATTGGGTTCTCC |
| GSK-3 $\beta$ P379/380A  | GGCTACCATCCTTATT <u>GCTGCT</u> CATGCTCGGATTCAAG     | CTTGAATCCGAGCAT <u>GAGCAGCA</u> ATAAGGATGGTAGCC      |
